# Supplementary material for: A neutrophil elastase-generated mature form of IL-33 is a potent regulator of endothelial cell activation and proliferative retinopathy
Source: PubMed Central journal article supplement (PMC11372157; doi:10.1038/s12276-024-01279-y), 2024-08-01

## **Supplementary Figure legends**

### **Supplementary Fig. 1**

Scans of immunoblots presented in figure 5a and 5b.

### **Supplementary Fig. 2**

Scans of immunoblots presented in figure 5c and 5d.

### **Supplementary Fig. 3**

Scans of immunoblots presented in figure 6a and 6b.

### **Supplementary Fig. 4**

Scans of immunoblots presented in figure 6c and 6d.

# Supplementary Fig. 1

## Blots presented in Fig. 5a

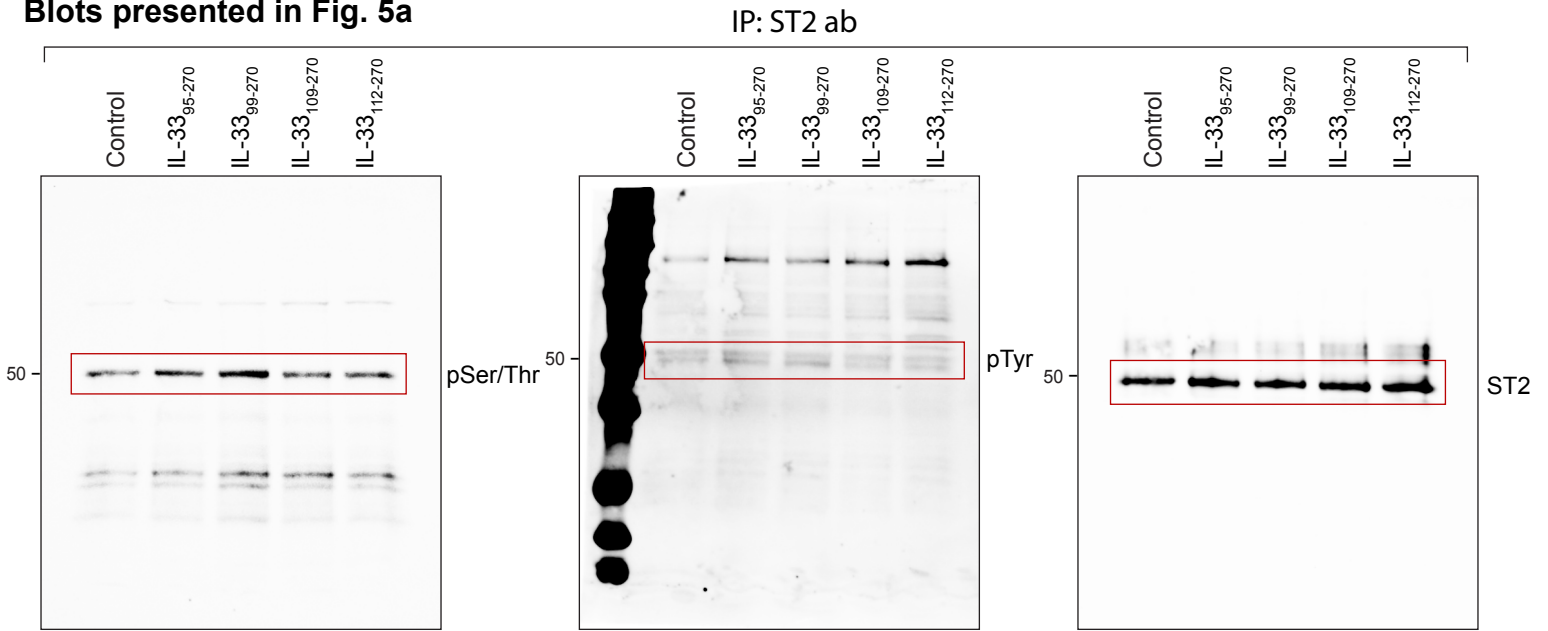

## Blots presented in Fig. 5b

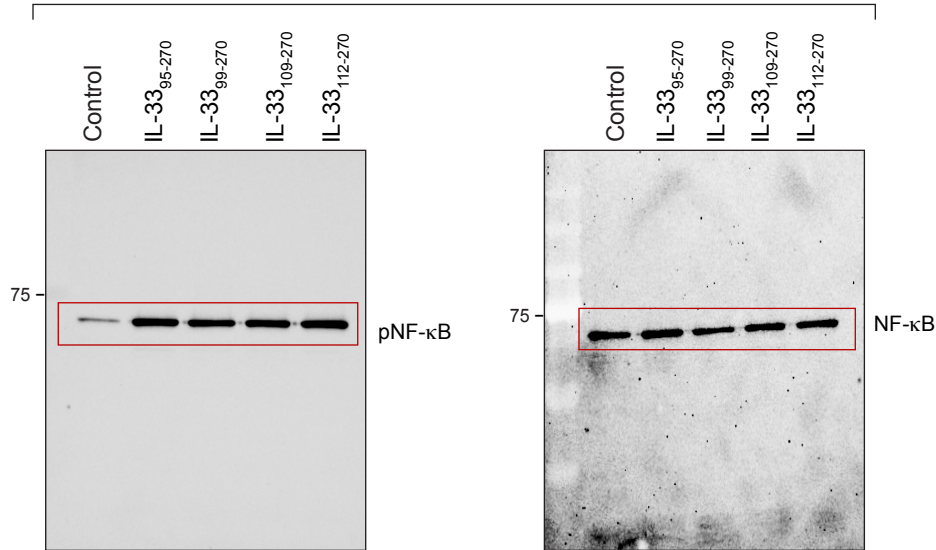

## Blots presented in Fig. 5b

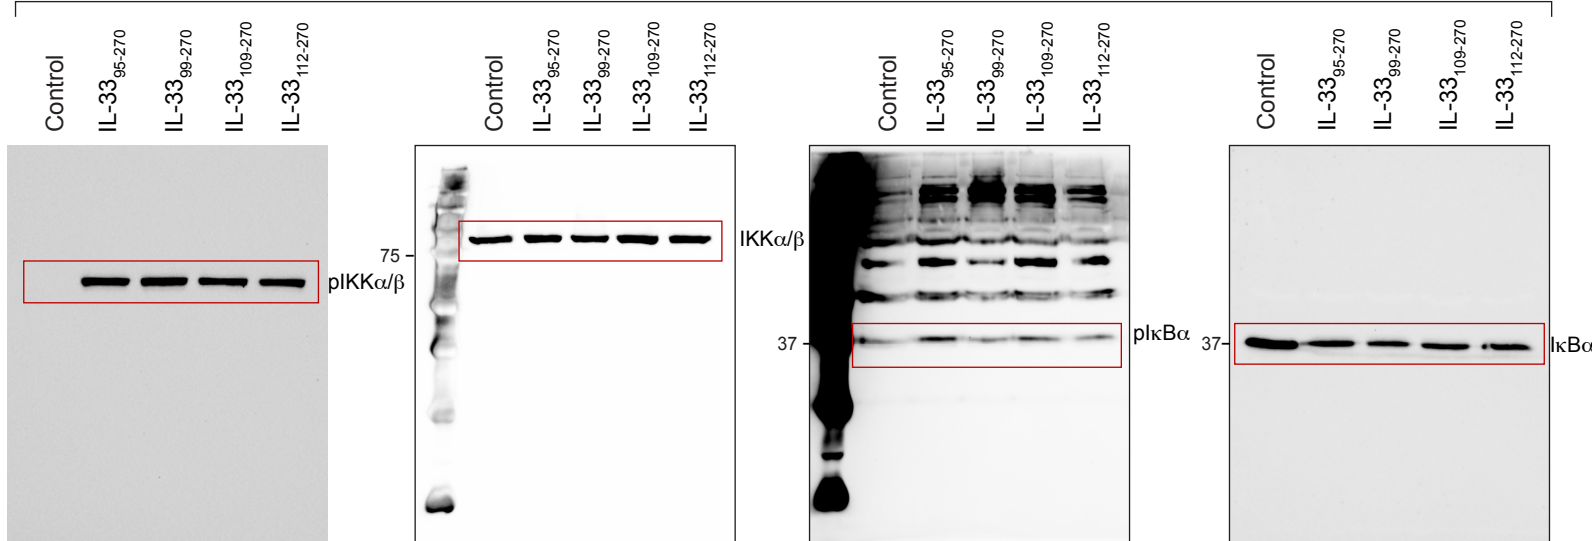

# Supplementary Fig. 2

## Blots presented in Fig. 5c

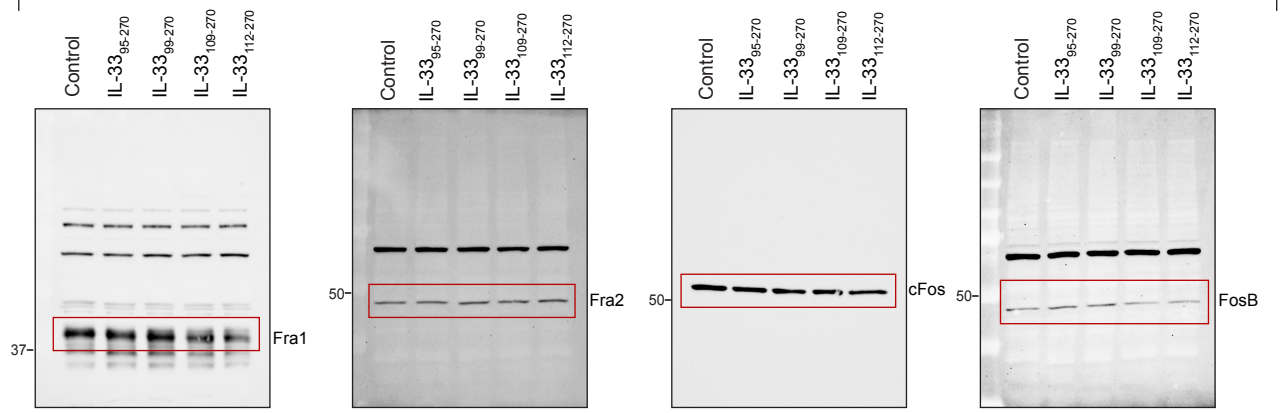

## Blots presented in Fig. 5c

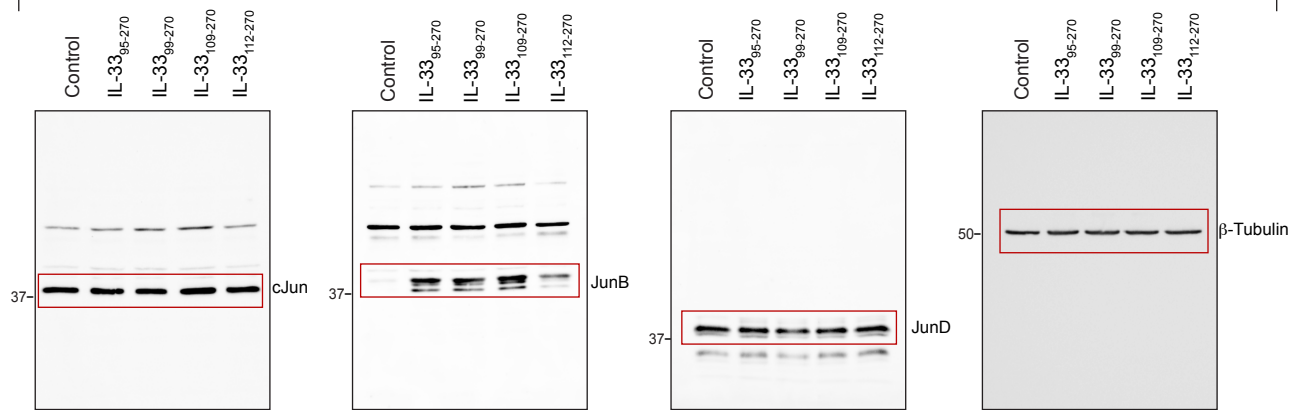

## Blots presented in Fig. 5d

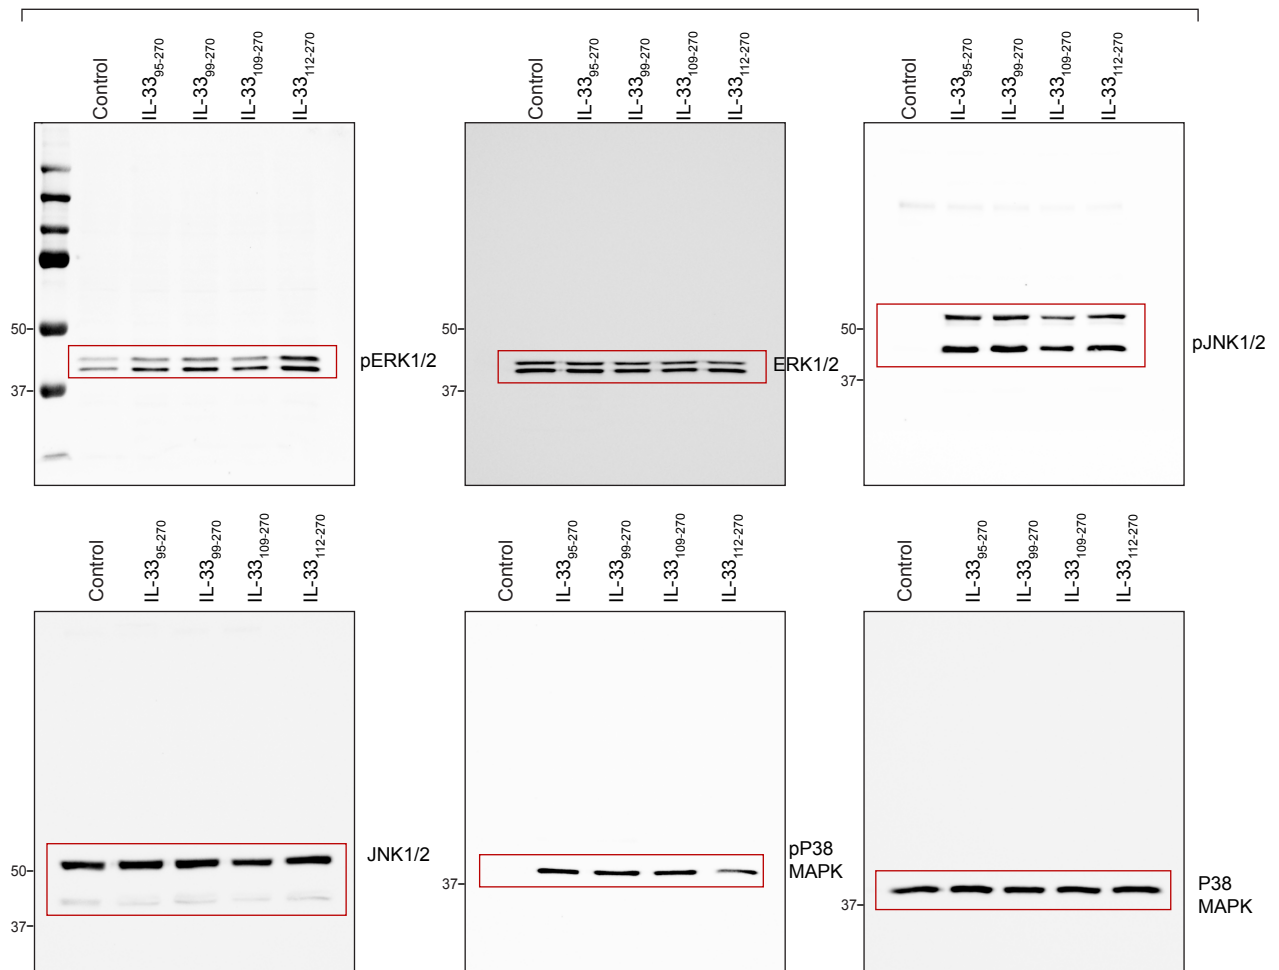

# Supplementary Fig. 3

## Blots presented in Fig. 6a

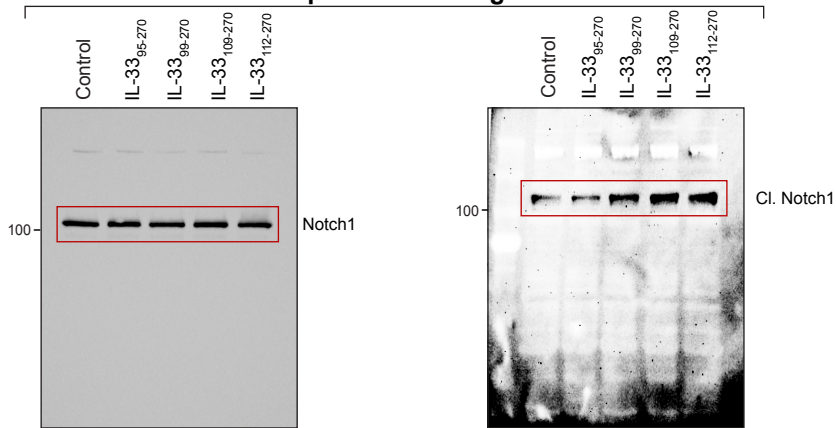

## Blots presented in Fig. 6a

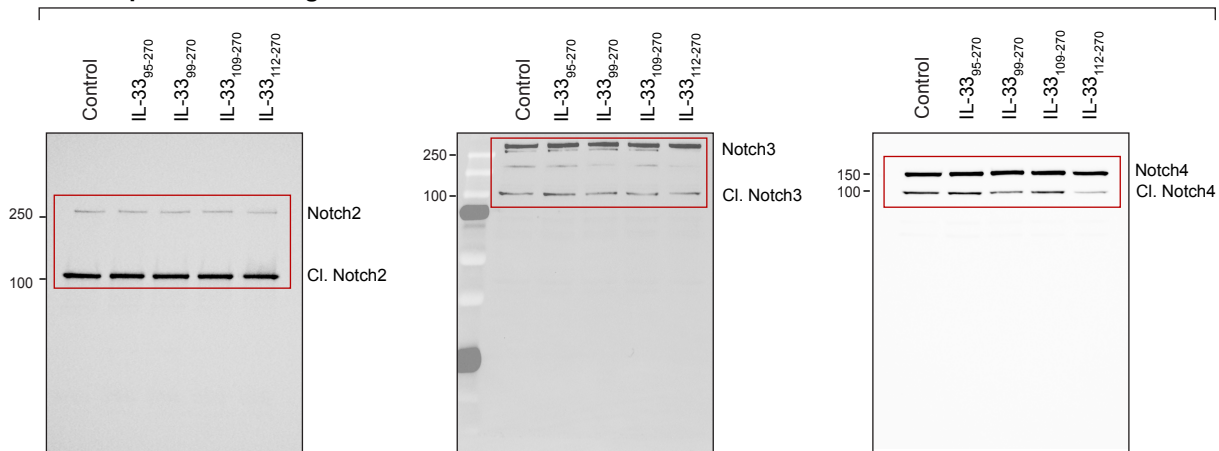

## Blots presented in Fig. 6b

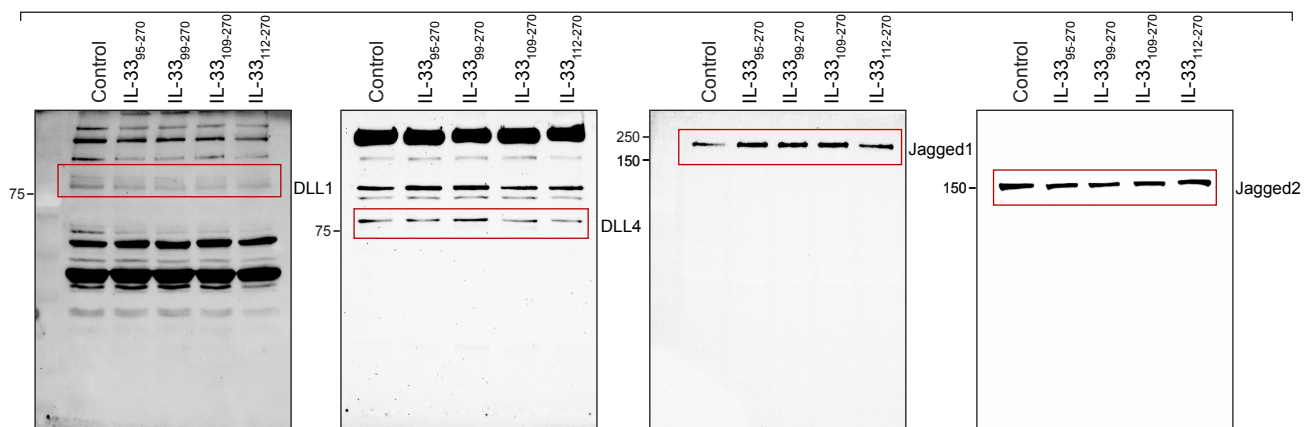

## Blots presented in Fig. 6b

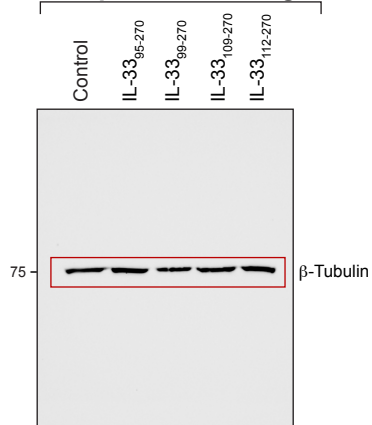

# Supplementary Fig. 4

## Blots presented in Fig. 6c

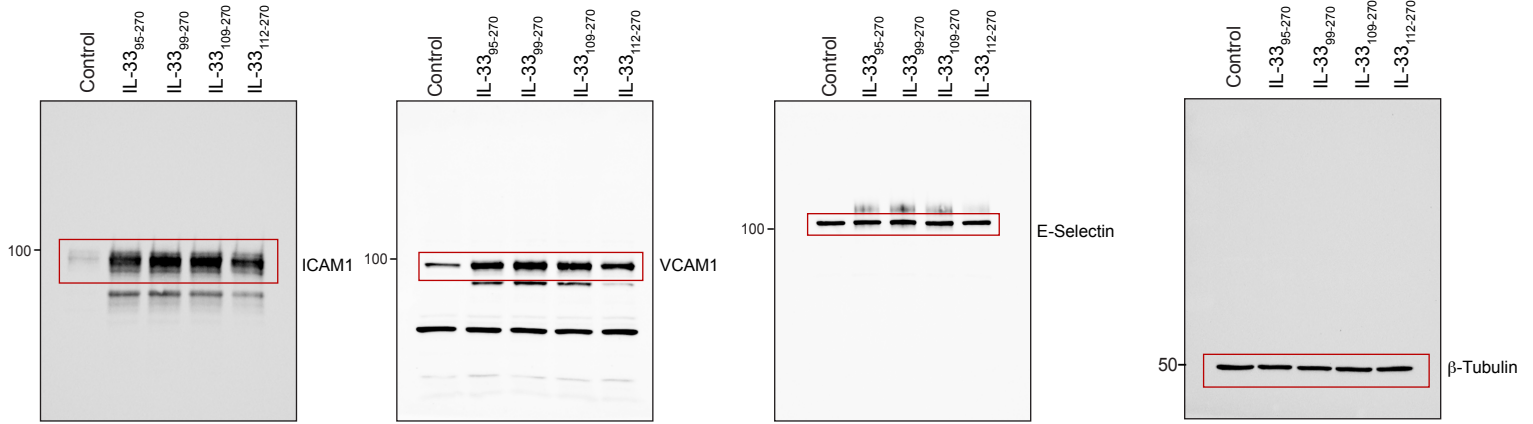

## Blots presented in Fig. 6d

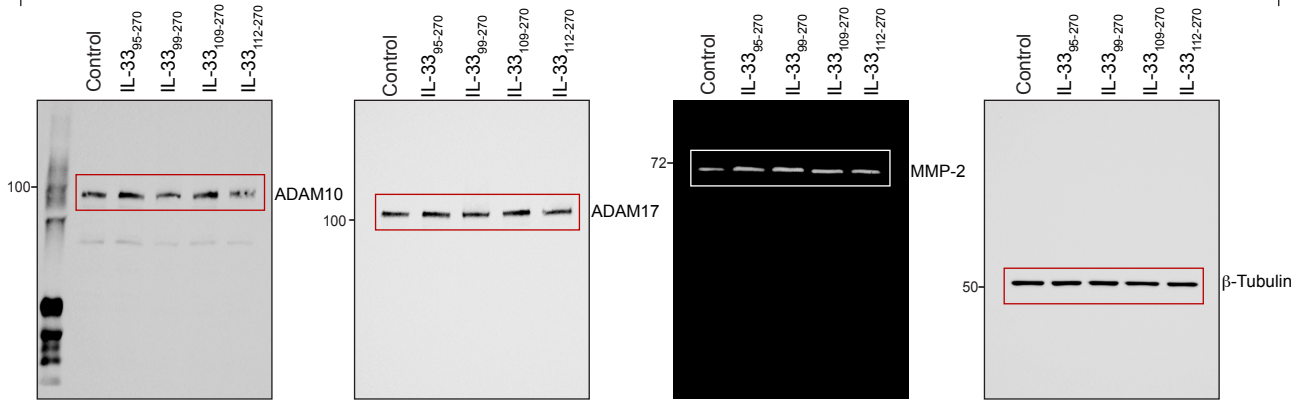

Supplement: 12276_2024_1279_MOESM1_ESM.pdf [file 12276_2024_1279_MOESM1_ESM.pdf]
